# Supplementary material for: Targeting of vasoactive intestinal peptide receptor 2, VPAC2, a secretin family G-protein coupled receptor, to primary cilia
Source: PubMed Central journal article supplement (PMC3711036; doi:10.1242/bio.20134747), 2013-05-23
Supplement: supp_bio.20134747_bio.20134747-s1.pdf [file supp_bio.20134747_bio.20134747-s1.pdf]

Supplementary Material

Livana Soetedjo et al. doi: 10.1242/bio.20134747

|                           |           |        |               |             |           |        |          |         |         |
|---------------------------|-----------|--------|---------------|-------------|-----------|--------|----------|---------|---------|
| humanVPAC2_CTerm          | 1 -SEVQCE | LKRKWR | SRCPTPSASRDYR | VCGSSFSRNG  | SEGALQF   | -----  | HRGSRAQS | FLOTETS | SVI     |
| mouseVPAC2_CTerm          | 1 -SEVQCE | LKRKWR | GLCLTQAGSRDY  | RLHSWSMSRNG | SESALQI   | -----  | HRGSRTQS | FLQSETS | SVI     |
| ratVPAC2_CTerm            | 1 -SEVQCE | LKRKWR | GLCLTQPGSRDY  | RLHSWSMSRNG | SESALQI   | -----  | HRGSRTQS | FLQSETS | SVI     |
| bovineVPAC2_CTerm         | 1 NSEVQSE | LRRRWR | GLWPSRPSARDY  | RLHSSSISR   | TGSDGALQ  | -----  | PRGSRAPS | LLQTE   | TSVI    |
| zebrafishVPAC2_CTerm      | 1 --EVOSE | LKRKWR | SLRLKRYIGRDY  | RLHSSSISR   | NGTENMAQF | -----  | QRNTRAQ  | SFLOTET | TVV     |
| tasmaniandevilVPAC2_CTerm | 1 -SEVQSE | LKRKWR | SLCLNQSMNRDY  | RLHSSSISR   | NGSEILHF  | -----  | HRNSRAHS | FLQTE   | TVI     |
| pigVPAC2_CTerm            | 1 -SEVQSE | LRRRWR | GLCPSRPSGRDY  | RLHSSSISR   | NGSEGALQV | -----  | PRGSRAPS | FLQME   | TSVI    |
| turkeyVPAC2_CTerm         | 1 -SEVQCE | LKRKWR | SLCWKQTAGRDY  | RLHSS-ISR   | NGSEVSOL  | -----  | HRNSRAQS | FMOTET  | TMI     |
| rhesusmacaqueVPAC2_CTerm  | 1 -SEVQCE | LKRKWR | SRCPTPSTSRDY  | RVCSSISR    | NGSEGALQF | -----  | HRGSRAQS | FLOTETS | SVI     |
| opossumVPAC2_CTerm        | 1 -SEVQCE | LKRKWR | GLCLNQSMNRDY  | RLHSSSISR   | NGSEVLHF  | -----  | HRNSRAHS | FLQTE   | TVI     |
| frogVPAC2_CTerm           | 1 -TEVOGE | LKRKWR | SLDYIRYKHKDK  | RMHSLTISR   | NGSEGVQF  | -----  | HRDSRAQS | IMQTE   | TMI     |
| humanVPAC1_CTerm          | 1 -GEVQAE | LRRKWR | RWHLQVGLGWN   | PKYRHP      | SGGSNGATC | STOV   | SMLTRV   | SPGARR  | SSFOAEV |
| mouseVPAC1_CTerm          | 1 -GEVQAE | LRRKWR | RWHLQVGLGWS   | SKQHP       | WGGSNGV   | SCSTOV | SMLTRV   | SPSARR  | SSFOAEV |
| ratVPAC1_CTerm            | 1 -GEVQAE | LRRKWR | RWHLQVGLGWS   | SKQHP       | WGGSNGATC | STOV   | SMLTRV   | SPSARR  | SSFOAEV |
| bovineVPAC1_CTerm         | 1 -GEVQAE | LRRKWR | RWHLQVGLGWD   | PKYQHP      | SAGSNGATC | STOV   | SMLTRV   | SPGAGR  | SSFOAEV |
| zebrafishVPAC1_CTerm      | 1 -GEVQGE | IKRKWR | RWHLEFLGPD    | TKYQHP      | SMGSGN    | GNFSTO | ISMLTR   | SPKTRR  | ASTCODE |
| tasmaniandevilVPAC1_CTerm | 1 -GEVQAE | FKRKWR | RWHLEFLGPD    | VKYHHP      | SVGSGN    | GNFSTO | ISMLTR   | SPKDRR  | SSFOAEV |
| pigVPAC1_CTerm            | 1 -GEVQAE | LRRKWR | RWHLQVGLGWD   | SKYQHP      | SGGSNGD   | TCSTOV | SMLTRV   | SPSARR  | SSFOAEV |
| turkeyVPAC1_CTerm         | 1 -GEVQAE | LRRKWR | RWHLEFLGSD    | MKYHHP      | SLGSGN    | TNFSTO | ISMLTK   | SPKTRR  | SSFOAEV |
| rhesusmacaqueVPAC1_CTerm  | 1 -GEVQAE | LRRKWR | RWHLQVGLGWN   | PKYRHP      | SGGSNSATC | STOV   | SMLTRV   | SPGARR  | SSFOAEV |
| opossumVPAC1_CTerm        | 1 -GEVQAE | IKRKWR | RWHLEFLGSD    | LKYHHP      | SVGSGN    | TNFSTO | ISMLTR   | SPKDRR  | SSFOAEV |
| frogVPAC1_CTerm           | 1 -GEVQCE | LKRKWR | RWHLEFLGSD    | MKYHHP      | SLGSGN    | TNFSTO | ISMLTK   | SPKTRR  | SSFOAEV |

Fig. S1. Related to Fig. 4. Amino acid sequence alignment of VPAC2's and VPAC1's C-termini. Amino acid sequences were aligned using CLUSTALW and shaded using BOXSHADE such that identical amino acids are shaded black, and conserved residues are shaded in gray. The last 44 amino acids (highlighted in green) of VPAC2's C-terminus differ significantly from those of VPAC1.

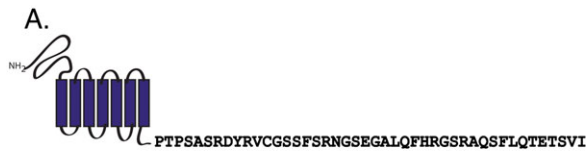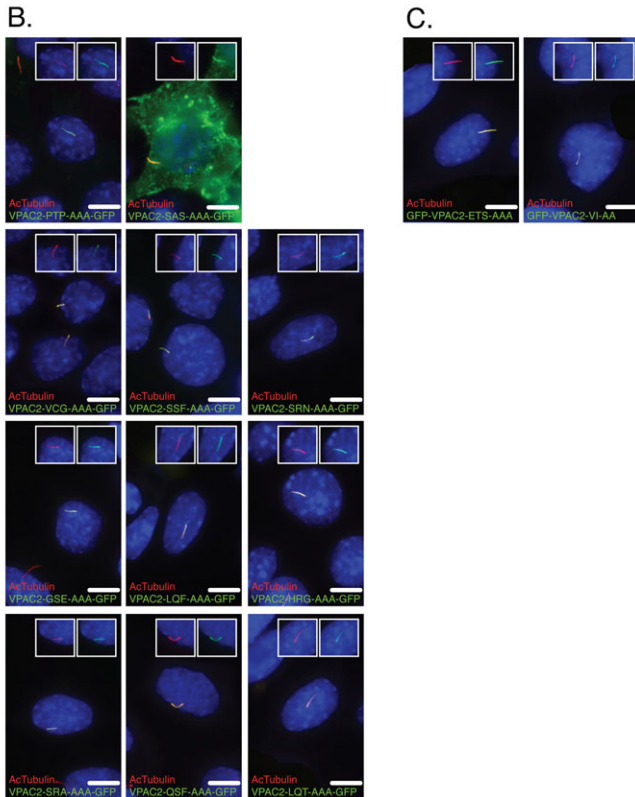

Fig. S2. Related to Fig. 5. (A) Schematic of VPAC2. The last 44 amino acids of VPAC2 C-terminus is shown in letters. (B) Representative images of mutated residues that did not affect ciliary targeting. IMCD3 cells expressing VPAC2-GFP harboring alanine mutations were serum starved to induce ciliogenesis. (C) ETSVI at the end of VPAC2's C terminus, a potential PDZ binding domain, is not important for ciliary targeting. IMCD3 cells expressing GFP-VPAC2 harboring alanine mutations were serum starved to induce ciliogenesis. (B,C) Cells were immunostained for acetylated  $\alpha$ -tubulin (red). DNA was labeled with mounting medium containing 4',6-diamidino-2-phenylindole (DAPI). Scale bars: 5  $\mu$ m.

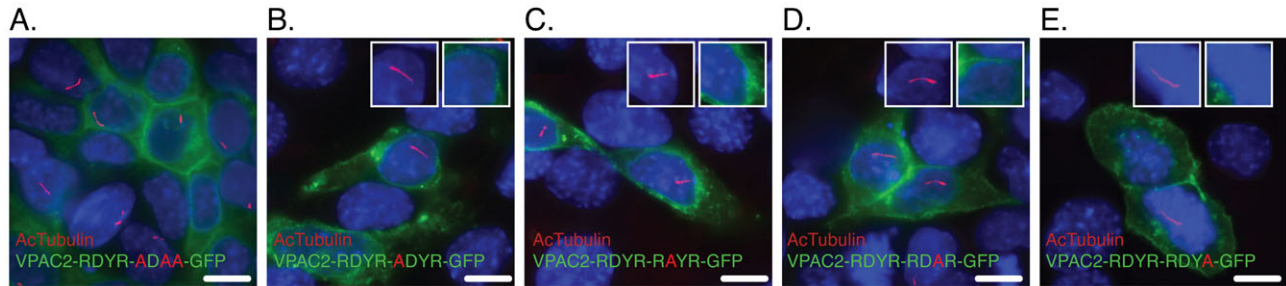

**Fig. S3. Related to Fig. 5.** (A) VPAC2 harboring RDYR→ADAA mutation in the C-terminus fails to target to cilia in IMCD3 cells. IMCD3 cells were transduced with lentivirus vectors expressing VPAC2-GFP with RDYR→ADAA mutation and serum starved. Cells were then immunostained for acetylated  $\alpha$ -tubulin (AcTubulin, red). (B–E) Single mutations in the RDYR motif abolish ciliary targeting of VPAC2 in IMCD3 cells. IMCD3 cells were transfected with plasmids expressing VPAC2-GFP harbouring RDYR→ADYR (D), RDYR→RAYR (E), RDYR→RDAR (F), and RDYR→RDYA (G) in the C terminus and were immunostained for acetylated  $\alpha$ -tubulin (AcTubulin, red). Insets show unmerged images of the region around cilia. DNA was labeled with mounting medium containing DAPI (A–E). Scale bars: 5  $\mu$ m.

**Table S1. List of GPCRs tested.**

| GPCR family                               | GPCRs tested                                                                                                                                                                                                                                                                                                                                                                                                      |
|-------------------------------------------|-------------------------------------------------------------------------------------------------------------------------------------------------------------------------------------------------------------------------------------------------------------------------------------------------------------------------------------------------------------------------------------------------------------------|
| Adhesion family (11)                      | BAI2, BAI3, CD97, ELTD1, EMR1, EMR2, GPR56, GPR64, GPR126, GPR133, LPHN1                                                                                                                                                                                                                                                                                                                                          |
| Glutamate family (6)                      | GABBR2, GPR5C5B, GPRC5C, GPRC5D, GRM3, GRM4                                                                                                                                                                                                                                                                                                                                                                       |
| Rhodopsin family (with known ligands, 58) | AGTR1, C3AR1, C5AR1, CCR1, CCR2, CCR6, CHRM1, CHRM2, CHRM3, CHRM5, CXCR6, CXCR7, CYSLTR1, DARC, EDNRA, EDNRB, F2R, F2RL1, FFAR1, FFAR2, FFAR3, FPR1, FPR3, FSHR, GHSR, GNRHR, GPER, HTR1B, HTR1D, LGR5, LTB4R, MAS1, MAS1L, MC1R, MC2R, MC3R, MRAP, <u>NPFFR2</u> , NMUR2, NPBWR2, OXGR1, P2RY2, P2RY4, P2RY5, P2RY6, P2RY8, P2RY10, P2RY12, P2RY13, P2RY14, PTAFR, RXFP1, RXFP3, TACR3, TRHR, TSHR, VN1R2, VN1R3 |
| Rhodopsin family (orphan, 33)             | GPR3, GPR4, GPR17, GPR18, GPR20, GPR21, GPR22, GPR34, GPR35, GPR37, GPR45, GPR52, GPR55, GPR63, GPR65, GPR68, GPR75, GPR78, GPR82, GPR83, GPR84, GPR85, GPR87, GPR107, GPR108, GPR119, GPR137B, GPR141, GPR146, GPR162, GPR171, GPR173, GPR177, GPR183                                                                                                                                                            |
| Secretin family (14)                      | CALCR, CALCRL, CRHR1, <u>CRHR2</u> , <u>GHRHR</u> , GIPR, GLP1R, GLP2R, PAC1, PTHR1, PTHR2, SCTR, VPAC1, VPAC2                                                                                                                                                                                                                                                                                                    |

All GPCRs are from human origin except NPFFR2, CRHR2 and GHRHR (underlined) are from mouse origin.

**Table S2. Oligonucleotides used in this study to construct the CD8 $\alpha$  chimeric constructs.**

|                                              | Primers                         |
|----------------------------------------------|---------------------------------|
| Full length C terminus (forward)             | GGAACCGTCGACAGTGAGGTGACAGTGCAG  |
| Truncated C terminus – from PTPSAS (forward) | GGAACCGTCGACCCGACCCCGTCCGCGAGC  |
| Full length/truncated C terminus (reverse)   | GTTGCTCGAGGATGACCGAGGTCTCCGTTTG |

**Table S3. Oligonucleotides used in this study to construct the lentivirus constructs encoding shRNAmiRs.**

|                                           | Primers                                                            |
|-------------------------------------------|--------------------------------------------------------------------|
| VPAC2 shRNAmiR #1 (nt 718) forward primer | TGCTGAAGAATACCAGGCTGAGCTTGGTTTTGGCCACTGACTGACCAAGCTCACTGGTATTCTT   |
| VPAC2 shRNAmiR #1 (nt718) reverse primer  | CCTGAAGAATACCAGTGAAGCTTGGTCAGTCAGTGGCCAAAACCAAGCTCAGCCTGGTATTCTTC  |
| VPAC2 shRNAmiR #2 (nt2126) forward primer | TGCTGTAGAGAACAACCTTGGGCTGAGTTTTGGCCACTGACTGACTCAGCCCAGTTGTTCTCTA   |
| VPAC2 shRNAmiR #2 (nt2126) reverse primer | CCTGTAGAGAACAACCTGGGCTGAGTCAGTCAGTGGCCAAAACCTCAGCCCAAGGTTGTTCTCTAC |
| BBS2 shRNAmiR (nt744) forward primer      | TGCTGAGAAAGGGCATAACCAAACCGTTTTGGCCACTGACTGACCGGTTTGGATGCCCTTTCT    |
| BBS2 shRNAmiR (nt744) reverse primer      | CCTGAGAAAGGGCATCCAAACCGGTCAGTCAGTGGCCAAAACCGTTTTGGTTATGCCCTTTCTC   |
| Tubby shRNAmiR #1 (nt1043) forward primer | TGCTGAGATGATGCCTTCTGAGGGTTGTTTTGGCCACTGACTGACAACCCTCAAGGCATCATCT   |
| Tubby shRNAmiR #1 (nt1043) reverse primer | CCTGAGATGATGCCTTCTGAGGGTTGTCAGTCAGTGGCCAAAACAACCCTCAGAAGGCATCATCTC |
| Tubby shRNAmiR #2 (nt1046) forward primer | TGCTGAGAAAGATGATGCCTTCTGAGGGTTTTGGCCACTGACTGACCCTCAGAACATCATCTTCT  |
| Tubby shRNAmiR #2 (nt1046) reverse primer | CCTGAGAAGATGATGTTCTGAGGGTCAGTCAGTGGCCAAAACCTCAGAAGGCATCATCTTCTC    |
| EmGFP-shRNAmiR forward primer             | CGCGAATTCACCGGTCGCCACCATGGTGAGCAAGGGCG                             |
| EmGFP-shRNAmiR reverse primer             | TCCTCTCGAGTGC GGCCAGATCTGG                                         |

**Table S4. Oligonucleotides used in this study for RT-qPCR.**

|                      | Primers                  |
|----------------------|--------------------------|
| GAPDH forward primer | AACCTGCCAAGTATGATGACATCA |
| GAPDH reverse primer | TGTTGAAGTACAGGAGACAACCT  |
| VPAC2 forward primer | CCATCTCTGTGCTGGTCAAG     |
| VPAC2 reverse primer | AGGTAGGCCAGGAAACACCT     |
| BBS2 forward primer  | AGAACTGAGCAGTCCCCTGA     |
| BBS2 reverse primer  | AAATGAGTACTGCCCGGATG     |
| Tubby forward primer | AAGAGCCGCTGATGGTACAG     |
| Tubby reverse primer | CTTGGTCTTCTTGCTGAGG      |
